# Supplementary material for: Integraal stikstofonderzoek; implementatie en gebruik van NitroGenius
Source: MDPI journal article supplement (doi:10.3390/cancers15010312), 2002-01-01
Supplement: s1 [file s1]

**Table S3.** ARNi administration in animal models of anthracycline-induced cardiotoxicity.

| <b>Paper by</b> | <b>Animal model</b>        | <b>Group size</b>  | <b>Dox protocol</b>                                                           | <b>Gavage protocol</b>                       | <b>Drugs + Dosage (mg/kg/d)</b>                                    | <b>Other findings</b> (in comparison to DOX + Vehicle groups)                                                                                                                                                                                                                                                                                                                             |
|-----------------|----------------------------|--------------------|-------------------------------------------------------------------------------|----------------------------------------------|--------------------------------------------------------------------|-------------------------------------------------------------------------------------------------------------------------------------------------------------------------------------------------------------------------------------------------------------------------------------------------------------------------------------------------------------------------------------------|
| Boutagy [1]     | 11-12-wk-old ♂ Wistar rats | <i>n</i> = 25 each | 2.15 mg/kg ip every 3 <sup>rd</sup> day for 3 wks (up to 15 mg/kg)            | Started on the day of Dox, cont. for 6 wks   | Sham - no Dox<br>Dox + Vehicle<br>Dox + ARB 31<br>Dox + ARNi 68    | ↑ LVEF in ARNi<br>↓ Myocyte vacuolation in ARNi and ARB<br>↓ Myocardial fibrosis in ARNi and ARB at 4 wks (no longer seen at 6 wks)<br>↓ Capillary density in ARNi at 6 wks<br>↓ MMP activity in ARNi at 4 wks<br>↓ Myocyte CSA and heart weight in all Dox-receiving groups<br>No differences in cellular apoptosis between groups                                                       |
| Dindas [2]      | 7–8-wk-old ♂ Balb-c mice   | <i>n</i> = 6 each  | 20 mg/kg ip. – 1 dose on 5th day of gavage                                    | Started 4 days before Dox, cont. for 9 days  | Vehicle<br>ARNi 80<br>Dox + Vehicle<br>Dox + ARNi 80               | ↓ Degenerative changes and streaking in cardiomyocytes in Dox + ARNi<br>↓ QRS duration, ST interval and QT/PQ index in Dox + ARNi<br>↓ NT-proBNP, TNF- $\alpha$ , IL-1 $\beta$ , IL-6, caspase 3 immunoreactivity in DOX + ARNi<br>↓ Total oxidant status and ↑ total antioxidant status in DOX + ARNi                                                                                    |
| Kim [3]         | ♂ Sprague-Dawley rats      | <i>n</i> = 8 each  | 5 mg/kg ip. q1w for 3 wks (up to 15 mg/kg)                                    | Started 1 day before Dox, cont. for 6 wks    | Vehicle<br>Dox + Vehicle<br>Dox + ARNi 60                          | ↓ Cardiomyocyte apoptosis in ARNi group<br>↓ Endoplasmic reticulum stress levels in ARNi group<br>↓ Serum troponin I and NT-proBNP levels in ARNi group                                                                                                                                                                                                                                   |
| Miyoshi [4]     | ♂ Sprague-Dawley rats      | <i>n</i> = 15 each | 1.5 mg/kg ip. for 10 days (up to 15 mg/kg) followed by 8 days of no treatment | Started on the day of Dox, cont. for 18 days | Sham - no Dox<br>Dox + Vehicle<br>Dox + Val 31<br>Dox + Sac/Val 68 | No differences in LVEF and FS<br>↑ Cardiomyocyte cross-sectional area in ARNi<br>↓ Cardiac fibrosis in ARNi<br>↓ Cardiac TNF $\alpha$ and ANP mRNA expression in ARB and ARNi<br>↓ Collagen I mRNA expression in ARNi<br>↓ Cardiac troponin T and NT-proBNP levels in ARNi<br>↓ Cardiac reactive oxygen species levels in ARNi<br>↑ Phosphorylation of AMPK and ↓ Bax/Bcl-2 ratio in ARNi |
| Maurea [5]      | ♀ C57Bl/6 mice             | <i>n</i> = 6 each  | 2.17 mg/kg ip. daily for 10 days                                              | Cont. for 10 days                            | Sham<br>Sac/Val 60<br>Dox<br>Dox + Sac/Val 60                      | ARNi improved EF and prevented the reduction of radial and longitudinal strain<br>↓ Cardiac expression of NLRP3, MyD88, DAMPs, and NF- $\kappa$ B in ARNi<br>↑ Expression of phosphorylated AMPK in ARNi<br>↓ Levels of Calgranulin S100 and galectine-3 in ARNi                                                                                                                          |
| Xia [6]         | 8-wk-old ♂ Balb-c mice     | <i>n</i> = 7 each  | 15 mg/kg ip. 3x/wk for 2 wks                                                  | Started the day after Dox, cont. for 4       | Vehicle<br>Dox + Vehicle                                           | ↓ Cardiac hypertrophy, myocardial fibrosis and cellular apoptosis in ARNi<br>↓ Heart weight/body weight ratio and ↑ heart weight/tibial length ratio in                                                                                                                                                                                                                                   |

|        |                                                   |                      |                                                     | wks,                                         | Dox + ARNi 80                                                                      | ARNi                                                                                                                                                                                                                                                                                                                                            |
|--------|---------------------------------------------------|----------------------|-----------------------------------------------------|----------------------------------------------|------------------------------------------------------------------------------------|-------------------------------------------------------------------------------------------------------------------------------------------------------------------------------------------------------------------------------------------------------------------------------------------------------------------------------------------------|
|        |                                                   |                      |                                                     |                                              |                                                                                    | ↑ Single cardiomyocyte contractile function in ARNi<br>↓ Pathologic morphologic changes to mitochondria and ↓ myocardial Drp1 expression in ARNi<br>↓ Cleaved caspase 3 level in ARNi                                                                                                                                                           |
| Ye [7] | 8-wk-old ♂<br>C57BL/6<br>mice                     | <i>n</i> = 7<br>each | 5 mg/kg ip. q1w for 3<br>wks (up to 15 mg/kg)       | Started the day after<br>Dox, cont. 6 wks,   | Vehicle<br>Dox + Vehicle<br>Dox + ARNi 60<br>TLR2 KO +<br>Vehicle<br>TLR2 KO + Dox | ↑ LVEF in ARNi, TLR2 KO, and TLR2 KO + Dox<br>↓ Thinning of the ventricular wall and enlargement of the heart cavity in ARNi and TLR2 KO<br>↓ Myocardial fibrosis in ARNi and TLR2 KO<br>↓ Myocardial collagen I and TGF- $\beta$ protein levels in ARNi and TLR2 KO<br>↓ Myocardial TNF $\alpha$ and NF- $\kappa$ B levels in ARNi and TLR2 KO |
| Yu [8] | 12-wk-old<br>♂ New<br>Zealand<br>white<br>rabbits | <i>n</i> = 5<br>each | 1.5 mg/kg iv. q1w for<br>5 wks (up to 7.5<br>mg/kg) | Started one wk after<br>Dox, cont. for 4 wks | Vehicle<br>Dox + Vehicle<br>Dox + ARNi 5<br>Dox + ARNi 10                          | ↓ PR segment, QRC segment prolongation, QT interARB and QT/PQ index in ARNi groups<br>↓ Serum BNP level in ARNi groups<br>↑ Activity of superoxide dismutase and catalase and ↓ lipid peroxidation in ARNi groups                                                                                                                               |

Abbreviations: AMPK – adenosine monophosphate-activated protein kinase; ANP – atrial natriuretic peptide; ARB – valsartan; ARNi – sacubitril/valsartan; BNP – brain natriuretic peptide; CSA – cross-sectional area; Dox – doxorubicin; Drp1 – dynamin-related protein 1; KO – knock-out; IL – interleukin; LVEF – left ventricle ejection fraction; NF- $\kappa$ B - nuclear factor kappa-light-chain-enhancer of activated B cells; NT-proBNP – N-terminal prohormone of brain natriuretic peptide; TGF $\beta$  – transforming growth factor  $\beta$ ; TNF $\alpha$  – tumor necrosis factor  $\alpha$ ; q1w – every week; wk – week. Symbols: ↑ / ↓ – significantly increased/decreased, ♂ – male, ♀ – female.

## References

1. Boutagy, N.E.; Feher, A.; Pfau, D.; Liu, Z.; Guerrero, N.M.; Freeburg, L.A.; Womack, S.J.; Hoenes, A.C.; Zeiss, C.; Young, L.H.; et al. Dual Angiotensin Receptor-Neprilysin Inhibition With Sacubitril/Valsartan Attenuates Systolic Dysfunction in Experimental Doxorubicin-Induced Cardiotoxicity. *JACC Cardiooncology* 2020, 2, 774–787.
2. Dindaş, F.; Güngör, H.; Ekici, M.; Akokay, P.; Erhan, F.; Doğduş, M.; Yılmaz, M.B. Angiotensin Receptor-Neprilysin Inhibition by Sacubitril/Valsartan Attenuates Doxorubicin-Induced Cardiotoxicity in a Pretreatment Mice Model by Interfering with Oxidative Stress, Inflammation, and Caspase 3 Apoptotic Pathway. *Anatol. J. Cardiol.* 2021, 25, 821–828.
3. Kim, B.S.; Park, I.-H.; Lee, A.-H.; Kim, H.-J.; Lim, Y.-H.; Shin, J.-H. Sacubitril/valsartan reduces endoplasmic reticulum stress in a rat model of doxorubicin-induced cardiotoxicity. *Arch. Toxicol.* 2022, 96, 1065–1074.
4. Miyoshi, T.; Nakamura, K.; Amioka, N.; Hatipoglu, O.F.; Yonezawa, T.; Saito, Y.; Yoshida, M.; Akagi, S.; Ito, H. LCZ696 ameliorates doxorubicin-induced cardiomyocyte toxicity in rats. *Sci. Rep.* 2022, 12, 4930.
5. Maurea, N.; Canale, M.L.; Buccolo, S.; Bisceglia, I.; Paccone, A.; Maurea, F.; Scherillo, M.; Quagliariello, V. Abstract 12402: Sacubitril-Valsartan Increases Pampk and Reduces Inflammasome, Myddosome, Il-6 and Galectin-3 Levels in Short-Term Doxorubicin-Treated Mice Improving Longitudinal Strain and Ejection Fraction. *Circulation* 2022, 146, A12402.

6. Xia, Y.; Chen, Z.; Chen, A.; Fu, M.; Dong, Z.; Hu, K.; Yang, X.; Zou, Y.; Sun, A.; Qian, J.; et al. LCZ696 improves cardiac function via alleviating Drp1-mediated mitochondrial dysfunction in mice with doxorubicin-induced dilated cardiomyopathy. *J. Mol. Cell. Cardiol.* 2017, 108, 138–148.
7. 48. Ye, S.; Su, L.; Shan, P.; Ye, B.; Wu, S.; Liang, G.; Huang, W. Lcz696 Attenuated Doxorubicin-Induced Chronic Cardiomyopathy through the Tlr2-Myd88 Complex Formation. *Front. Cell Dev. Biol.* 2021, 9, 654051. Yu, C.; Li, D.; Li, Z.; Yu, D.; Zhai, G. Effect of sacubitril/valsartan on inflammation and oxidative stress in doxorubicin-induced heart failure model in rabbits. *Acta Pharm.* 2021, 71, 473–484.
