# Supplementary material for: Integraal stikstofonderzoek; implementatie en gebruik van NitroGenius
Source: MDPI journal article supplement (doi:10.3390/cancers15010312), 2002-01-01
Supplement: s1 [file s1]

**Table S1.** ARNi administration in preclinical models of MI.

| Paper by     | Animal model                               | Gavage protocol                                    | Drug dosage (mg/kg/d)*                                         | LVEF (%)                                                                |  | Other findings*                                                                                                                                                                                                                                                    |
|--------------|--------------------------------------------|----------------------------------------------------|----------------------------------------------------------------|-------------------------------------------------------------------------|--|--------------------------------------------------------------------------------------------------------------------------------------------------------------------------------------------------------------------------------------------------------------------|
| Chang [1]    | 4-7-mo-old ♂ and ♀ Sprague-Dawley rats     | Started 1 wk after MI (LVEF≤40%), cont. for 4 wks  | Vehicle<br>Enalapril 20<br>ARNi 68                             | 38.5 ± 2.0<br>46.7 ± 9.1 ↑<br>57.6 ± 5.5 ↑↑                             |  | ↓↓ Heart weight/body weight ratio in ARNi<br>↓↓ Ventricular arrhythmias inducibility in ARNi<br>↑↑ Expression of K <sup>+</sup> channel proteins in ARNi                                                                                                           |
| Chang [2]    | ♂ New Zealand White rabbits (2.5-4 kg)     | Started 1 wk after MI (LVEF<40%), cont. for 4 wks  | Vehicle<br>ARB 30<br>ARNi 60                                   | 37.1 ± 6.3<br>44.3 ± 6.3 ↑<br>53.8 ± 10.0 ↑↑                            |  | ↓↓ Ventricular arrhythmia inducibility in ARNi                                                                                                                                                                                                                     |
| Ishii [3]    | 10-12-wk-old mice                          | Started 1 day after MI (FS < 30%), cont. for 4 wks | Vehicle<br>Enalapril 4<br>ARNi 20                              | NA                                                                      |  | ↓↓ Post-MI mortality rate due to LV rupture in ARNi<br>↑↑ FS 14 and 28 days post-MI in ARNi<br>↓↓ Myocardial expression of IL1β, IL6, and MMP-9 mRNA in ARNi<br>No differences in myocardial fibrosis and inflammatory infiltration between groups.                |
| Kompa [4]    | ♂ Sprague-Dawley rats (250–300 g)          | Started 1 wk after MI, cont. for 4 wks             | Vehicle<br>Perindopril 2<br>ARNi 60                            | 40.46 ± 1.27<br>42.22 ± 1.16<br>46.65 ± 0.83 ↑↑                         |  | ARNi significantly improved end-systolic pressure-volume relationship compared to perindopril<br>↓ LV mass, cardiomyocyte CSA, and cardiac fibrosis in perindopril and ARNi<br>↓↓ ANP, MHCβ, and TIMP2 gene expression in ARNi                                     |
| Liu [5]      | ♂ 4-8-wk-old C57BL/6J mice                 | Started immediately after MI, cont. for 4 wks      | Vehicle<br>Benazepril 10<br>ARNi 60<br>ARNi 60 + Benazepril 10 | =<br>58.7 ± 0.42 ↑<br>62.35 ± 0.25 ↑↑                                   |  | Heart weight/body weight ratio ↓ in ARNi and benazepril and ↓↓ in ARNi + benazepril<br>Myocardial fibrosis ↓ in ARNi and ↓↓ in ARNi + benazepril<br>↓↓ TGFβ1 expression in ARNi and ARNi + benazepril<br>No differences in IL6 and TNFα expression between groups. |
| Pfau [6]     | 8-10-wk-old ♂ Lewis rats                   | Started 1 wk after MI                              | Vehicle<br>ARB 31<br>ARNi 68                                   | 1 wk: 34 ± 2<br>5 wks: 35 ± 2<br>38 ± 2<br>39 ± 2<br>39 ± 2 ↑<br>42 ± 2 |  | ↓ Heart weight/tibial length ratio and fibrosis in ARNi<br>↓ Myocardial fibrosis in ARNi<br>↓ Myocyte CSA in ARNi and ARB<br>↓ Expression of CTGF, MHCβ, MHCβ/α, and ANP in ARNi and ARB                                                                           |
| Raj [7]      | ♂ Sprague-Dawley rats (175–215 g)          | Started immediately after MI, cont. for 8 wks      | Vehicle<br>ARB 31<br>ARNi 68                                   | 56.60 ± 1.70<br>65.45 ± 2.70 ↑<br>66.82 ± 1.43 ↑                        |  | ↓ Oxidative stress in ARNi and ARB<br>↓ TNFα, collagen, and BNP in ARNi and ARB                                                                                                                                                                                    |
| Shen [8]     | ♂ 3-mo-old Sprague-Dawley rats (260–300 g) | Started 1 wk after MI, cont. for 1 wk              | Vehicle<br>ARNi 68                                             | 3 days: ↑<br>7 days: ↑                                                  |  | ↓ Interstitial fibrosis in ARNi<br>↓ Serum IL1βa and IL18 levels in ARNi<br>↓ ROS accumulation and NLRP3 inflammasome activation in ARNi                                                                                                                           |
| Suematsu [9] | 8-10-wk-old ♂ C57BL/6J diabetic mice       | Started day after MI, cont. for 4 wks              | Vehicle<br>ARB 30<br>ARNi 60                                   | 29 ± 3.2<br>=<br>43 ± 3.4 ↑                                             |  | ↓↓ LV fibrosis and expression of TGFβ mRNA in ARNi<br>↓ Heart weight/body weight ratio in ARB and ARNi<br>↓ ANP mRNA in ARNi                                                                                                                                       |

|                       |                                        |                                                         |                               |                                               |                                                                                                                                                                                                                    |
|-----------------------|----------------------------------------|---------------------------------------------------------|-------------------------------|-----------------------------------------------|--------------------------------------------------------------------------------------------------------------------------------------------------------------------------------------------------------------------|
| Torrado<br>[10]       | ♂ New Zealand<br>White rabbits         | I: at reperfusion<br>only                               |                               | ARB =<br>ARNi ↑                               | ↓ Infarct size in ARB and ARNi and ↓ cardiac troponin I serum concentration<br>in ARNi                                                                                                                             |
|                       |                                        | II: started at LVEF ≤<br>40%, cont. up to 10<br>wks     | Vehicle<br>ARB 9.1<br>ARNi 20 | ARB =<br>ARNi ↑↑                              |                                                                                                                                                                                                                    |
|                       |                                        | III: started at<br>reperfusion, cont.<br>for 10 wks     |                               | 4 wks<br>ARB =<br>ARNi ↑↑                     | 10 wks<br>= ↑<br>↓ Infarct size in ARNi                                                                                                                                                                            |
| Trivedi<br>[11]       | ♂ SHRs                                 | Started 4 wks after<br>reperfusion, cont.<br>for 12 wks | Vehicle<br>ARB 31<br>ARNi 68  | =<br>=<br>↑↑                                  | ↓ Infarct border zone expansion in ARB and ARNi<br>Aortic vasorelaxation responses to Ach and SNP ↑ in ARB and ↑↑ in ARNi<br>↑↑ Myocardial NO bioavailability in ARNi<br>No differences in fibrosis between groups |
| Vaskova<br>[12]       | 6-8-wk-old ♀<br>Sprague-Dawley<br>rats | Started 1 wk after<br>MI, cont. for 7 wks               | Vehicle<br>ARB 31<br>ARNi 68  | 36.79 ± 2.1<br>40.68 ± 4.8 ↑<br>41.42 ± 3.4 ↑ | ↑ Production of plasma exosomes in ARB and ARNi<br>↓↓ Expression of rno-miR-181a in ARNi<br>↓ Fibrosis in ARB and ARNi                                                                                             |
| von<br>Lueder<br>[13] | 8-10-wk-old ♂<br>Lewis rats            | Started 1 wk after<br>MI, cont. for 4 wks               | Vehicle<br>ARNi 68            | 47±5<br>60±2 ↑                                | Improved LV function in pressure-volume loops in ARNi<br>↓ LV mass and fibrosis in peri-infarct and remote myocardium in ARNi<br>No differences in infarct size and perivascular fibrosis between groups.          |

Abbreviations: Ach – acetylcholine; ANP – atrial natriuretic peptide; ARNi – sacubitril/valsartan, ARB – valsartan; cont. – continued; CSA – cross-sectional area; CTGF – connective tissue growth factor; FS – fractional shortening; IL – interleukin; LV – left ventricle; LVEF – left ventricle ejection fraction; MHCβ – myosin heavy chain β; MI – myocardial infarction; MMP – matrix metalloproteinase; mo – month; NA – not assessed; NLRP3 – NLR family pyrin domain containing 3; NO – nitric oxide; ROS – reactive oxygen species; SHRs – spontaneously hypertensive rats; SNP – sodium nitroprusside; TGFβ – transforming growth factor β; TIMP2 – tissue inhibitor of metalloproteinases 2; TNFα – tumor necrosis factor α; wk – week. Symbols: ↑/↓ – significantly increased/decreased compared to placebo; ↑↑/↓↓ – significantly increased/decreased compared to placebo and other groups; = – no significant change compared to placebo, ♂ – male, ♀ – female

\* Groups and results presented in the Table S1 were chosen due to their importance for the review, they do not exhaust all of the results presented in selected papers.

## References:

1. Chang, P.-C.; Lin, S.-F.; Chu, Y.; Wo, H.-T.; Lee, H.-L.; Huang, Y.-C.; Wen, M.-S.; Chou, C.-C. LCZ696 Therapy Reduces Ven-tricular Tachyarrhythmia Inducibility in a Myocardial Infarction-Induced Heart Failure Rat Model. *Cardiovasc. Ther.* 2019, 2019, 6032631.
2. Chang, P.-C.; Wo, H.-T.; Lee, H.-L.; Lin, S.-F.; Chu, Y.; Wen, M.-S.; Chou, C.-C. Sacubitril/Valsartan Therapy Ameliorates Ventricular Tachyarrhythmia Inducibility in a Rabbit Myocardial Infarction Model. *J. Card. Fail.* 2020, 26, 527–537.
3. Ishii, M.; Kaikita, K.; Sato, K.; Sueta, D.; Fujisue, K.; Arima, Y.; Oimatsu, Y.; Mitsuse, T.; Onoue, Y.; Araki, S.; et al. Cardio-protective Effects of LCZ696 (Sacubitril/Valsartan) After Experimental Acute Myocardial Infarction. *JACC: Basic Transl. Sci.* 2017, 2, 655–668.
4. Kompa, A.R.; Lu, J.; Weller, T.J.; Kelly, D.J.; Krum, H.; von Lueder, T.G.; Wang, B.H. Angiotensin receptor neprilysin inhibition provides superior cardioprotection compared to angiotensin converting enzyme inhibition after experimental myocardial infarction. *Int. J. Cardiol.* 2018, 258, 192–198.

5. Liu, Y.; Fan, Y.; Li, J.; Chen, M.; Chen, A.; Yang, D.; Guan, X.; Cao, Y. Combination of LCZ696 and ACEI further improves heart failure and myocardial fibrosis after acute myocardial infarction in mice. *Biomed. Pharmacother.* 2021, 133, 110824.
6. Pfau, D.; Thorn, S.L.; Zhang, J.; Mikush, N.; Renaud, J.M.; Klein, R.; Dekemp, R.A.; Wu, X.; Hu, X.; Sinusas, A.J.; et al. Angiotensin Receptor Neprilysin Inhibitor Attenuates Myocardial Remodeling and Improves Infarct Perfusion in Experimental Heart Failure. *Sci. Rep.* 2019, 9, 5791.
7. Raj, P.; Sayfee, K.; Parikh, M.; Yu, L.; Wigle, J.; Netticadan, T.; Zieroth, S. Comparative and Combinatorial Effects of Resveratrol and Sacubitril/Valsartan alongside Valsartan on Cardiac Remodeling and Dysfunction in MI-Induced Rats. *Molecules* 2021, 26, 5006.
8. Shen, J.; Fan, Z.; Sun, G.; Qi, G. Sacubitril/Valsartan (Lcz696) Reduces Myocardial Injury Following Myocardial Infarction by Inhibiting Nlrp3-Induced Pyroptosis Via the Tak1/Jnk Signaling Pathway. *Mol. Med. Rep.* 2021, 24, 676.
9. Suematsu, Y.; Miura, S.-I.; Goto, M.; Matsuo, Y.; Arimura, T.; Kuwano, T.; Imaizumi, S.; Iwata, A.; Yahiro, E.; Saku, K. LCZ696, an angiotensin receptor-neprilysin inhibitor, improves cardiac function with the attenuation of fibrosis in heart failure with reduced ejection fraction in streptozotocin-induced diabetic mice. *Eur. J. Heart Fail.* 2016, 18, 386–393.
10. Torrado, J.; Cain, C.; Mauro, A.G.; Romeo, F.; Ockaili, R.; Chau, V.Q.; Nestler, J.A.; Devarakonda, T.; Ghosh, S.; Das, A.; et al. Sacubitril/Valsartan Averts Adverse Post-Infarction Ventricular Remodeling and Preserves Systolic Function in Rabbits. *J. Am. Coll. Cardiol.* 2018, 72, 2342–2356.
11. Trivedi, R.K.; Polhemus, D.J.; Li, Z.; Yoo, D.; Koiwaya, H.; Scarborough, A.; Goodchild, T.T.; Lefer, D.J. Combined Angiotensin Receptor-Neprilysin Inhibitors Improve Cardiac and Vascular Function Via Increased No Bioavailability in Heart Failure. *J. Am. Heart Assoc.* 2018, 7, e008268.
12. Vaskova, E.; Ikeda, G.; Tada, Y.; Wahlquist, C.; Mercola, M.; Yang, P.C. Sacubitril/Valsartan Improves Cardiac Function and Decreases Myocardial Fibrosis Via Downregulation of Exosomal miR-181a in a Rodent Chronic Myocardial Infarction Model. *J. Am. Heart Assoc.* 2020, 9, e015640.
13. von Lueder, T.G.; Wang, B.H.; Kompa, A.R.; Huang, L.; Webb, R.; Jordaan, P.; Atar, D.; Krum, H. Angiotensin Receptor Neprilysin Inhibitor LCZ696 Attenuates Cardiac Remodeling and Dysfunction After Myocardial Infarction by Reducing Cardiac Fibrosis and Hypertrophy. *Circ. Heart Fail.* 2015, 8, 71–78.
